# Supplementary material for: The Immune Efficacy of Inactivated Pseudorabies Vaccine Prepared from FJ-2012ΔgE/gI Strain
Source: MDPI journal article supplement (doi:10.3390/microorganisms10101880), 2022-09-21
Supplement: s1 [file s1]

**Table S1.** The results of piglets PRV gB and gE antibody via serological ELISA before vaccination.

| Serum sample No.         | gB antibody <sup>a</sup> |          | gE antibody <sup>b</sup> |          |
|--------------------------|--------------------------|----------|--------------------------|----------|
|                          | S/N                      | Result   | S/N                      | Result   |
| FJ-2012-GEL*-1           | 1.17                     | Negative | 1.00                     | Negative |
| FJ-2012-GEL* 2           | 1.27                     | Negative | 1.01                     | Negative |
| FJ-2012-GEL*-3           | 1.24                     | Negative | 0.97                     | Negative |
| FJ-2012-GEL*-4           | 1.33                     | Negative | 1.10                     | Negative |
| FJ-2012-GEL*-5           | 1.16                     | Negative | 1.08                     | Negative |
| FJ-2012-VG*-1            | 1.17                     | Negative | 1.15                     | Negative |
| FJ-2012-VG*-2            | 1.20                     | Negative | 1.03                     | Negative |
| FJ-2012-VG*-3            | 1.05                     | Negative | 1.11                     | Negative |
| FJ-2012-VG*-4            | 1.09                     | Negative | 1.05                     | Negative |
| FJ-2012-VG*-5            | 1.19                     | Negative | 1.06                     | Negative |
| vPRV*-1                  | 1.23                     | Negative | 0.93                     | Negative |
| vPRV*-2                  | 1.20                     | Negative | 0.99                     | Negative |
| vPRV*-3                  | 1.11                     | Negative | 0.99                     | Negative |
| vPRV*-4                  | 1.20                     | Negative | 0.94                     | Negative |
| vPRV*-5                  | 1.27                     | Negative | 1.05                     | Negative |
| K61-1                    | 1.24                     | Negative | 1.11                     | Negative |
| K61-2                    | 1.15                     | Negative | 0.98                     | Negative |
| K61-3                    | 1.12                     | Negative | 0.98                     | Negative |
| K61-4                    | 1.03                     | Negative | 0.99                     | Negative |
| K61-5                    | 1.08                     | Negative | 0.99                     | Negative |
| Unimmunized challenged-1 | 1.12                     | Negative | 1.04                     | Negative |
| Unimmunized challenged-2 | 1.17                     | Negative | 0.96                     | Negative |
| Unimmunized challenged-3 | 1.20                     | Negative | 1.06                     | Negative |
| Unimmunized challenged-4 | 1.20                     | Negative | 1.03                     | Negative |
| Unimmunized challenged-5 | 1.19                     | Negative | 1.00                     | Negative |
| Control-1                | 1.03                     | Negative | 0.97                     | Negative |
| Control-2                | 1.14                     | Negative | 1.04                     | Negative |
| Control-3                | 1.06                     | Negative | 1.04                     | Negative |
| Control-4                | 0.99                     | Negative | 1.02                     | Negative |
| Control-5                | 0.90                     | Negative | 1.04                     | Negative |

<sup>a</sup> gB-specific antibody levels: a sample with S/N ratios  $\geq 0.70$  were classified as negative for gB antibodies; <sup>b</sup> gE-specific antibody levels: a sample with S/N ratios  $\geq 0.70$  were classified as negative for gE antibodies. The “\*” mark in the group top right indicates an inactivated vaccine.
